# Supplementary material for: Epigenetically induced ectopic expression of UNCX impairs the proliferation and differentiation of myeloid cells
Source: PubMed Central journal article supplement — Haematologica. 2017 Apr 14;102(7):1204–14. doi: 10.3324/haematol.2016.163022 (PMC5566027; doi:10.3324/haematol.2016.163022), 2017-07
Supplement: 2016_163022-Disclosures_and_Contributions.pdf [file 2016_163022-Disclosures_and_Contributions.pdf]

Haematologica  
HAEMATOL/2016/163022  
Version 3

Epigenetically induced ectopic expression of UNCX impairs the proliferation and differentiation of myeloid cells

Giulia Daniele, Giogia Simonetti, Caterina Fusilli, Ilaria Iacobucci, Angelo Lonoce, Antonio Palazzo, Mariana Lomiento, Fabiana Mammoli, Rene' Massimiliano Marsano, Elena Marasco, Vilma Mantovani, Hilmar Quentmeier, Hans G. Drexler, Jie Ding, Orazio Palumbo, Massimo Carella, Niroshan Nadarajah, Margherita Perricone, Emanuela Ottaviani, Carmen Baldazzi, Nicoletta Testoni, Cristina Papayannidis, Sergio Ferrari, Tommaso Mazza, Giovanni Martinelli, and Clelia Tiziana Storlazzi

Disclosures: This work was supported by the AIRC (Associazione Italiana per la Ricerca sul Cancro; AIRC IG no. 15413 for CTS), European LeukemiaNet, AIL (Associazione Italiana contro le Leucemie-Linfomi e Mieloma), AIL Modena, Fondazione Del Monte di Bologna e Ravenna, FIRB 2006, Ateneo RFO grants, and Progetto Regione-Università 2010-12 (L. Bolondi). The authors declare no potential conflicts of interest.

Contributions: GD and CTS conceived the study and wrote the manuscript. II, SF, and GM participated in the design of the study. GD, II, ML, EM, VM, OP, GS, AP, and CTS drafted the manuscript. GD, AL, HQ, HDG, JD, OP, MC, RMM, and AP performed the molecular genetic studies and performed the statistical analysis. CF and TM performed the bioinformatic analyses. ML, FM, and GD performed the retrovirus-mediated gene transfer. EM and VM performed the methylation study and performed the statistical analysis. II and NN performed DNMT3A mutational analysis. GS performed the clinical correlation analysis. MP, EO, CB, NT, and CP provided the biological samples of the patients. All authors read and approved the final manuscript.
